# Supplementary material
Source: Springer Nature journal article supplement (https://www.springermedizin.de/resource/supplementary/12986_2009_184_MOESM1_ESM.pdf/25655542)

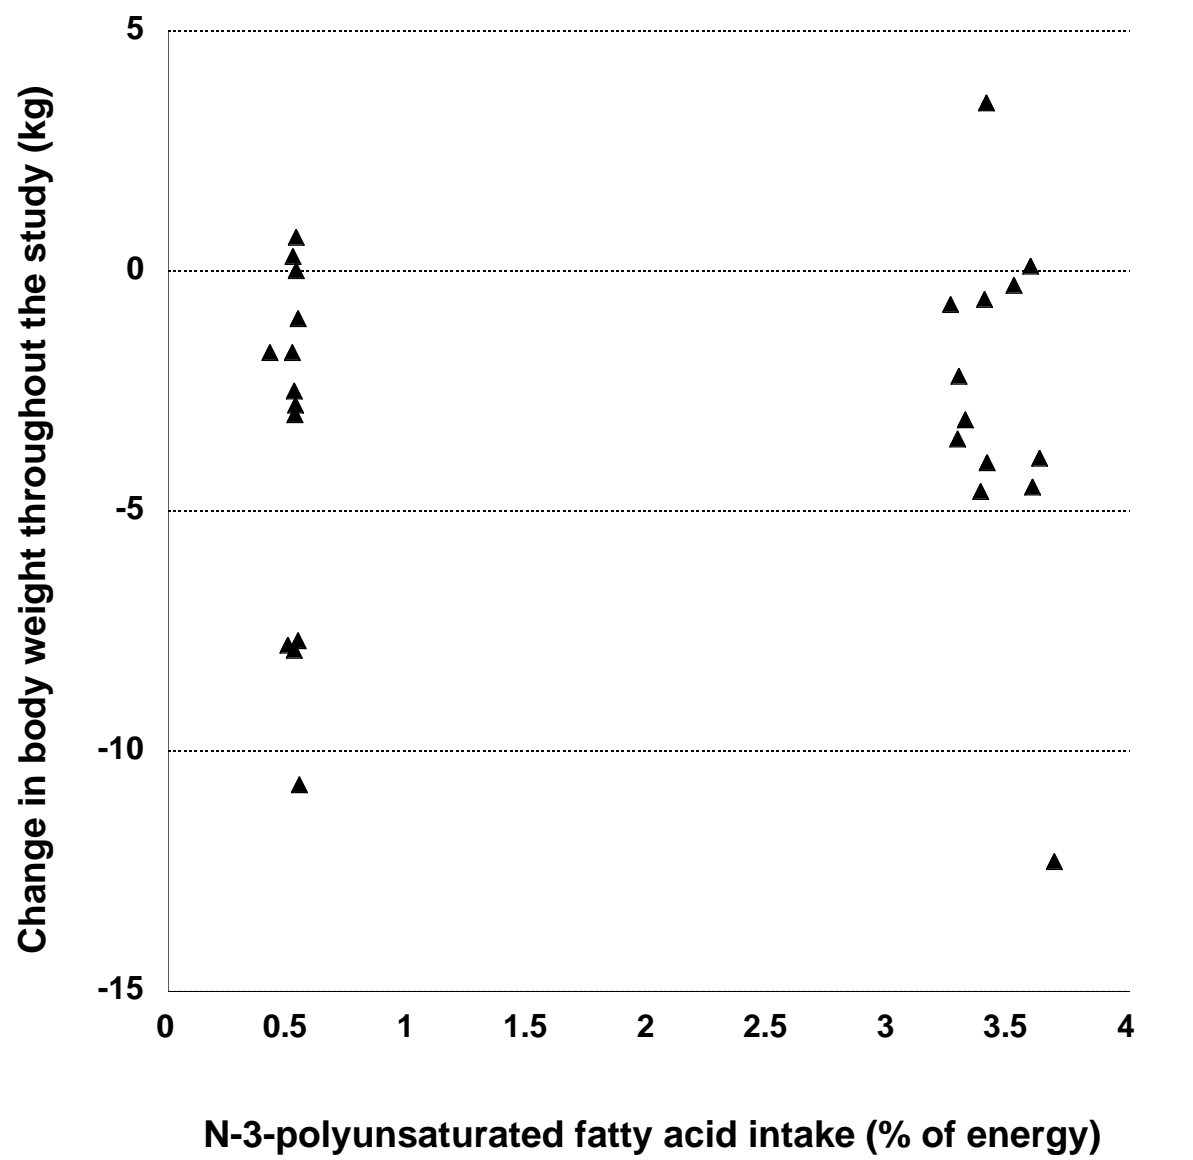

Supplement: MOESM1 [file 25655542]
